# Supplementary material
Source: PubMed Central journal article supplement (PMC6890228)

# Training (Figure 1)

Vehicle

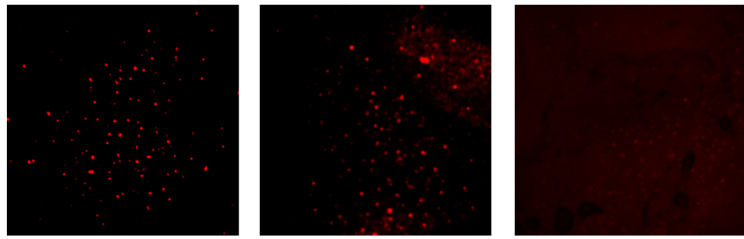

Lidocaine

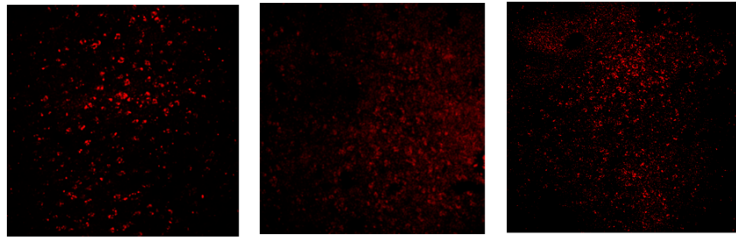

# Retrieval (Figure 2)

*Context A*

Vehicle

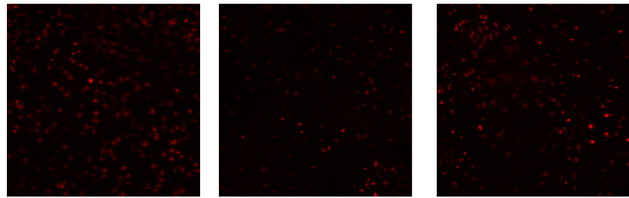

Lidocaine

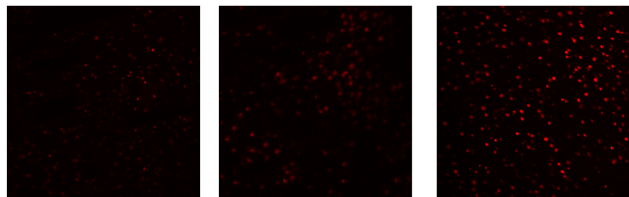

*Context B*

No Reactivation

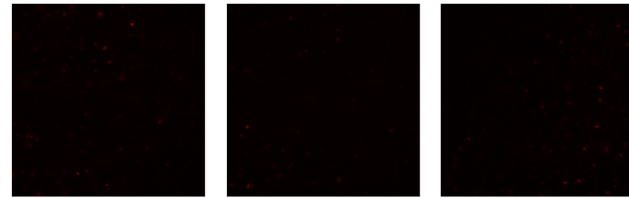

Vehicle

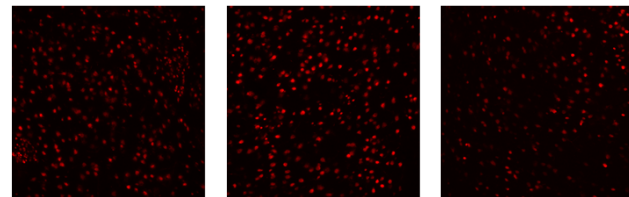

Supplement: NIHMS1543685-supplement-3.pdf [file NIHMS1543685-supplement-3.pdf]
