# Supplementary material
Source: PubMed Central journal article supplement (PMC6890228)

### Dorsal Hippocampus

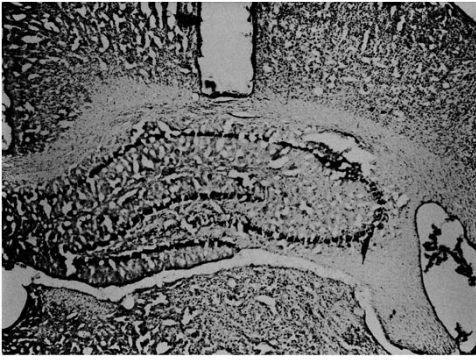

### Amygdala

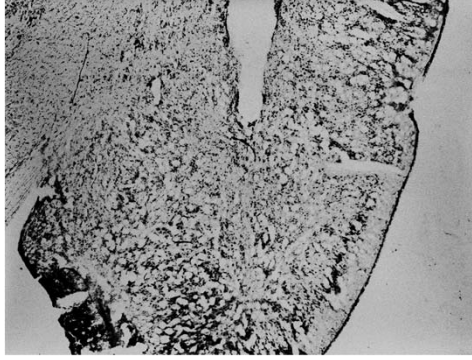

Key: (DH-AMY)

● : VEH-VEH

○ : VEH-ANI

▲ : LIDO-VEH

△ : LIDO-ANI

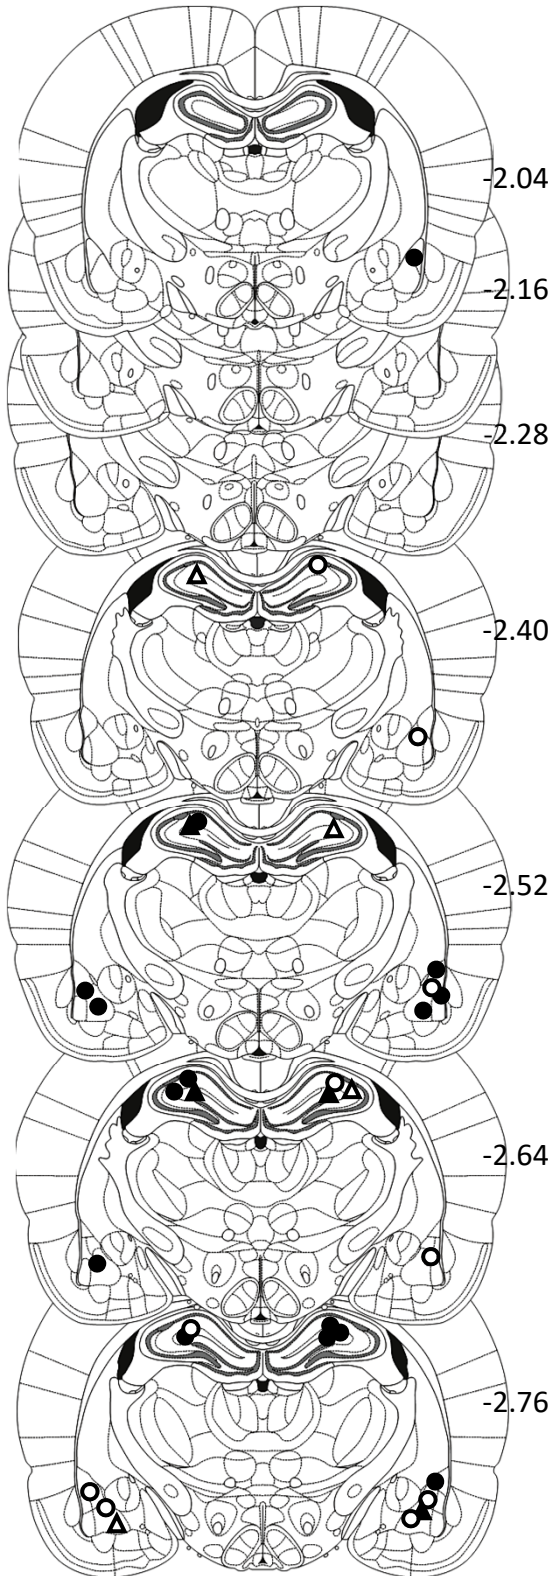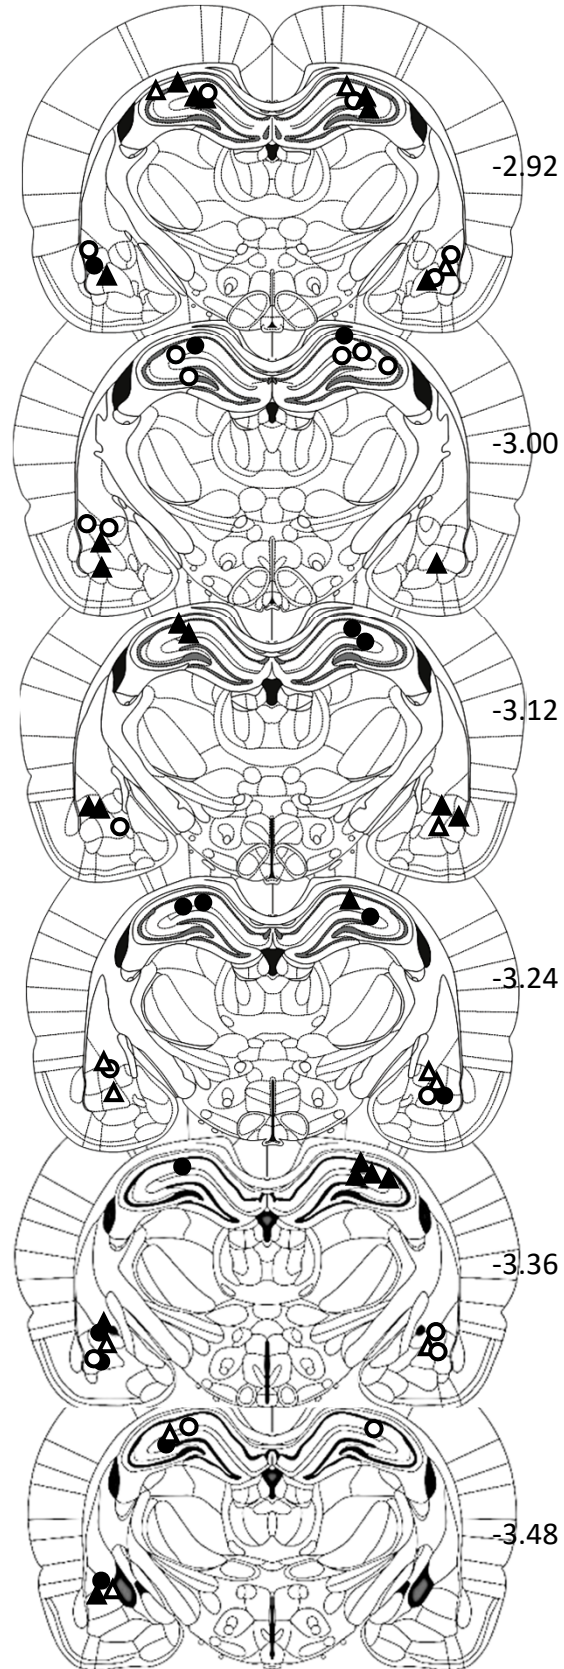

Supplement: NIHMS1543685-supplement-4.pdf [file NIHMS1543685-supplement-4.pdf]

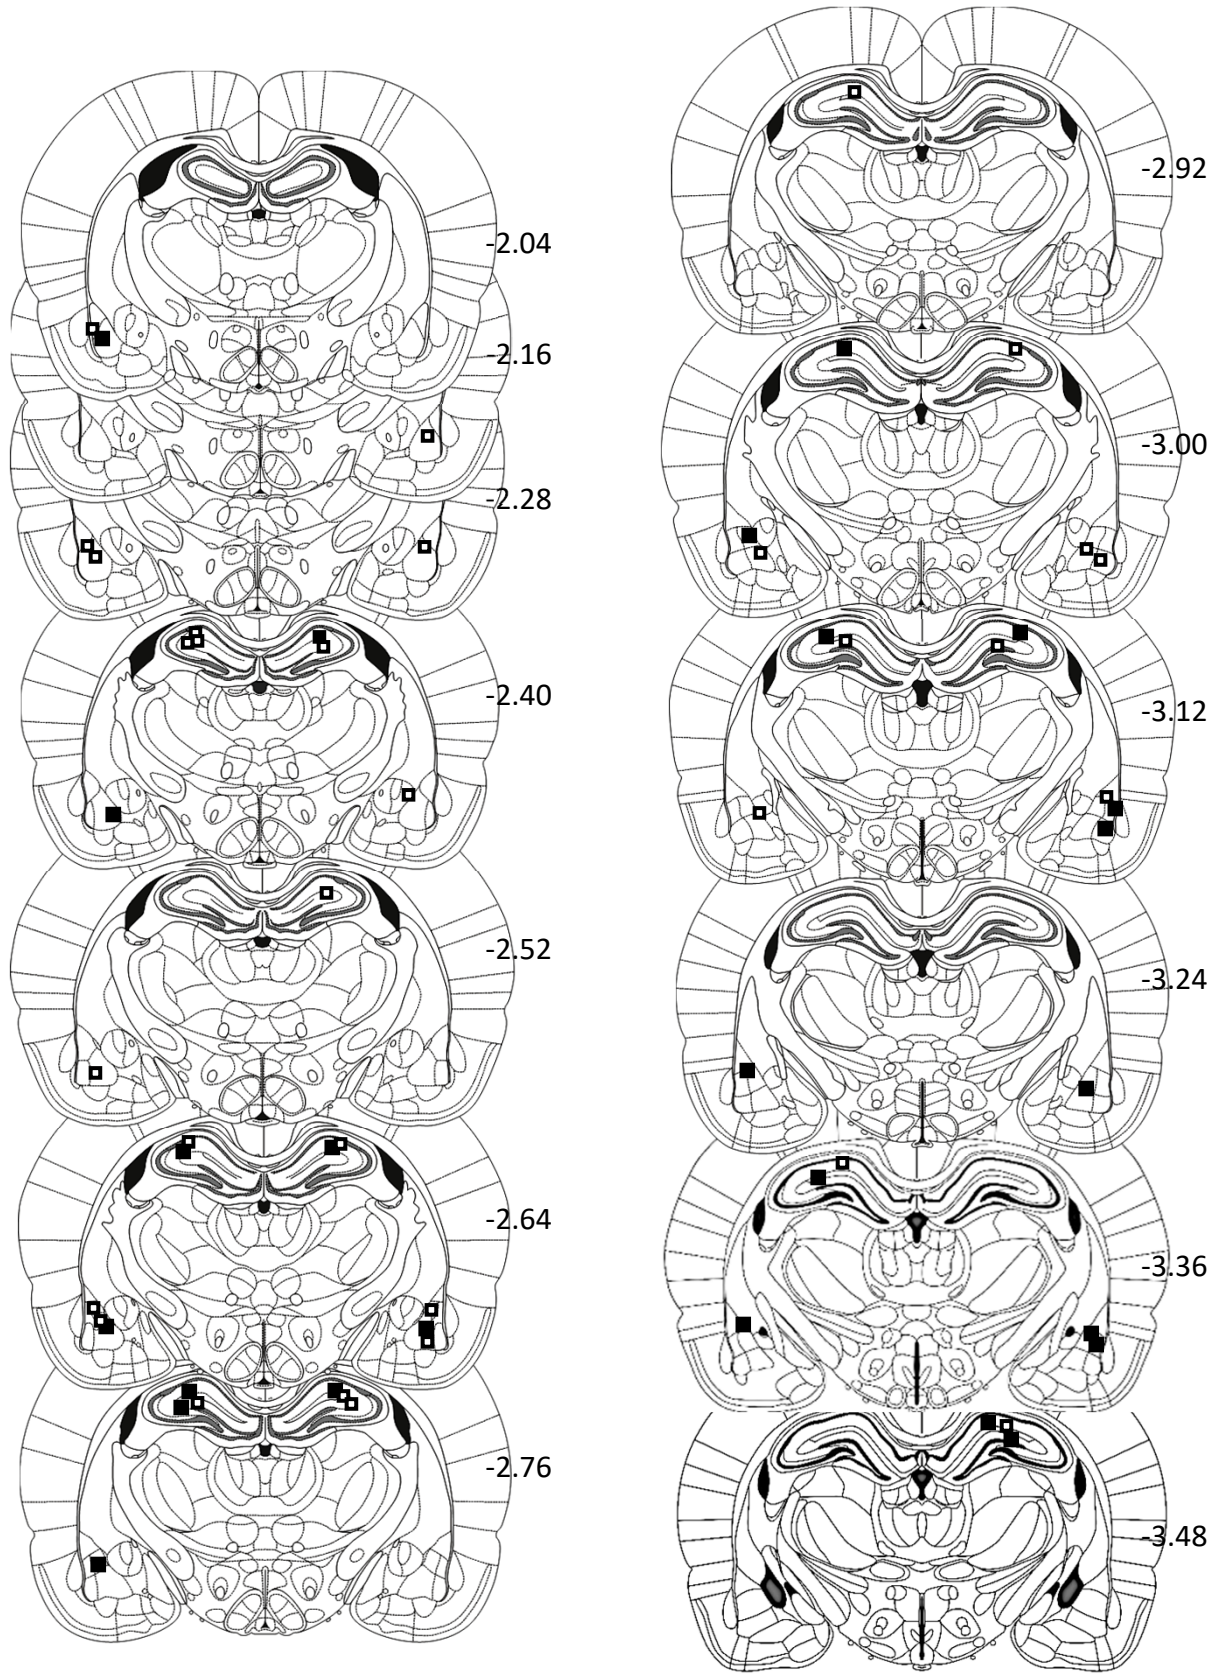

Key: (DH-AMY)

- : LIDO-VEH
- : LIDO-ANI

Supplement: NIHMS1543685-supplement-5.pdf [file NIHMS1543685-supplement-5.pdf]
